# Supplementary material for: Surface-plasmon-enhanced ultraviolet emission of Au-decorated ZnO structures for gas sensing and photocatalytic devices
Source: publisher site journal article supplement (doi:10.3762/bjnano.9.70), 2018-03-01
Supplement: Additional file 1 [file 2190-4286-9-70-S1.pdf]

# Supporting Information

for

## Surface-plasmon-enhanced ultraviolet emission of Au-decorated ZnO structures for gas sensing and photocatalytic devices

T. Anh Thu Do<sup>1\*§</sup>, Truong Giang Ho<sup>1</sup>, Thu Hoai Bui<sup>2</sup>, Quang Ngan Pham<sup>1</sup>, Hong Thai Giang<sup>1</sup>, Thi Thu Do<sup>1</sup>, Duc Van Nguyen<sup>1</sup> and Dai Lam Tran<sup>3</sup>

Address: <sup>1</sup>Institute of Materials Science, Vietnam Academy of Science and Technology, 18 Hoang Quoc Viet, Cau Giay, 100000, Hanoi, Vietnam, <sup>2</sup>Petro Vietnam University, 762 Cach Mang Thang 8, Longtoan, 790000, Ba Ria-Vung Tau, Vietnam and <sup>3</sup>Graduate University of Science and Technology, Vietnam Academy of Science and Technology, 18 Hoang Quoc Viet, Cau Giay, 100000, Hanoi, Vietnam

\*Corresponding author

Email: T. Anh Thu Do - [thudta@ims.vast.vn](mailto:thudta@ims.vast.vn)

§Tel.: +84-243-7569318; Fax: +84-243-8360705

### Additional spectra

## I. Gas sensing characteristics

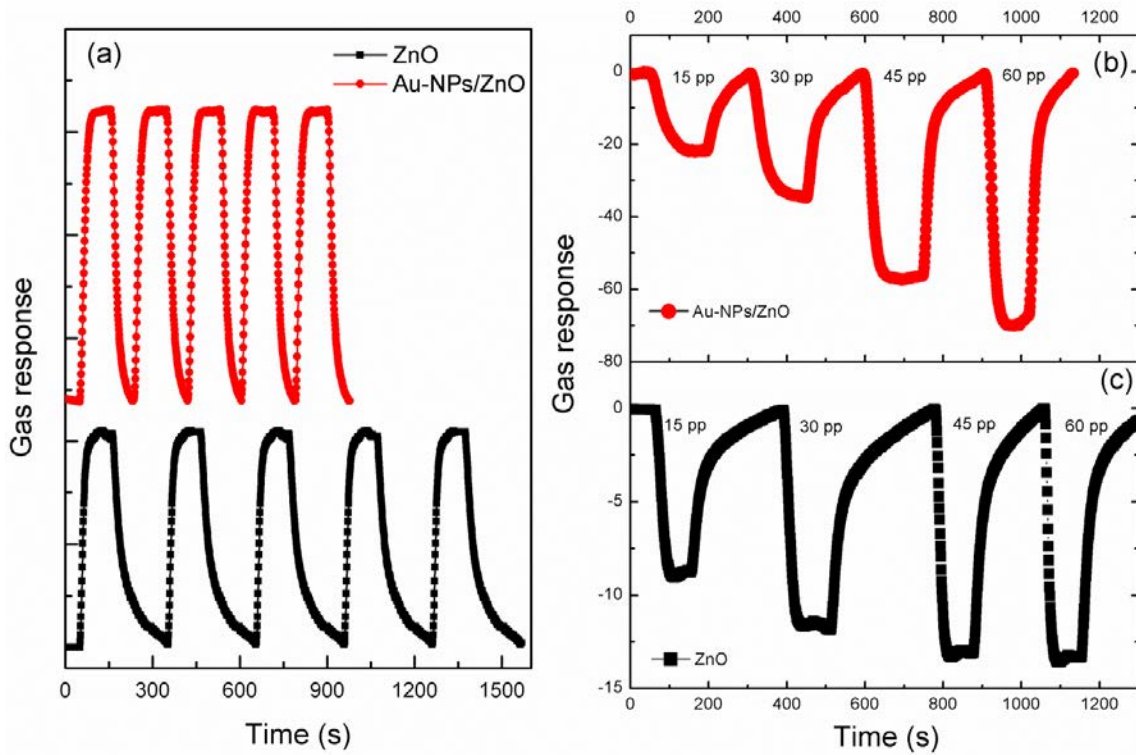

**Figure S1:** (a) Response cycles of all samples to 10 ppm NO<sub>2</sub> at operating temperature (120 °C); (b) and (c) dynamic transient of resistances in response to *n*-propane (C<sub>3</sub>H<sub>8</sub>) detection for ZnO and Au-NPs/ZnO sensors at 120 °C, respectively.

## II. Photocatalytic degradations

The decoloration percentage which demonstrates the photocatalytic activity of both samples is evaluated by the PL quenching of RhB in the photocatalyst-mixed solution, which is determined by the expression,

$$\text{PL quenching (\%)} = \frac{(I_0 - I(t))}{I_0} \times 100\%$$

where  $I_0$  and  $I(t)$  are the integrated PL intensity of RhB solution before and after visible light irradiation, respectively.

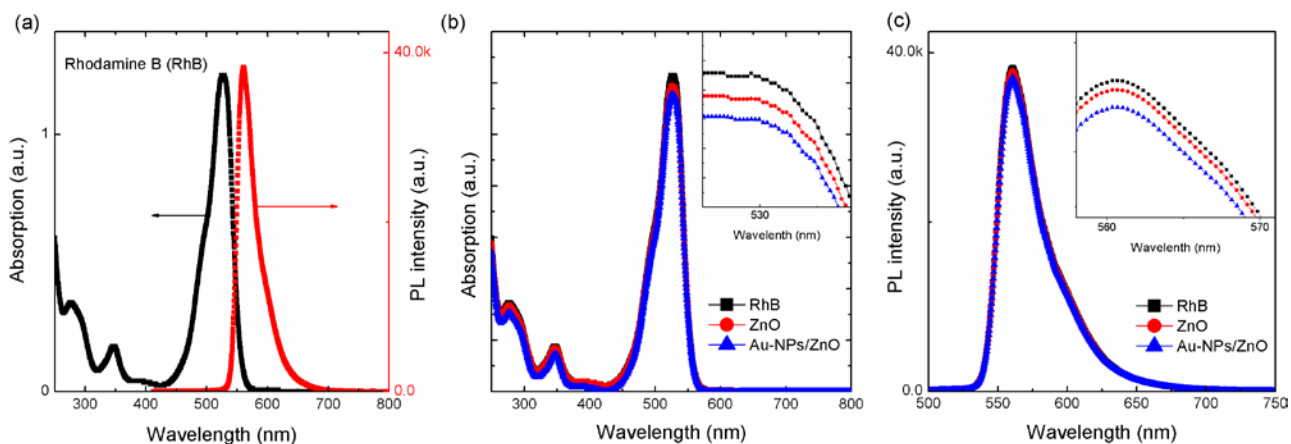

**Figure S2:** (a) UV-vis absorption and PL spectrum of Rhodamine B (RhB) aqueous solution at room temperature; (b) UV-vis absorption spectra; and (c) PL spectra of all samples, indicating slight decreases in the photo-decomposes even after 40 min (the inset of b and c).

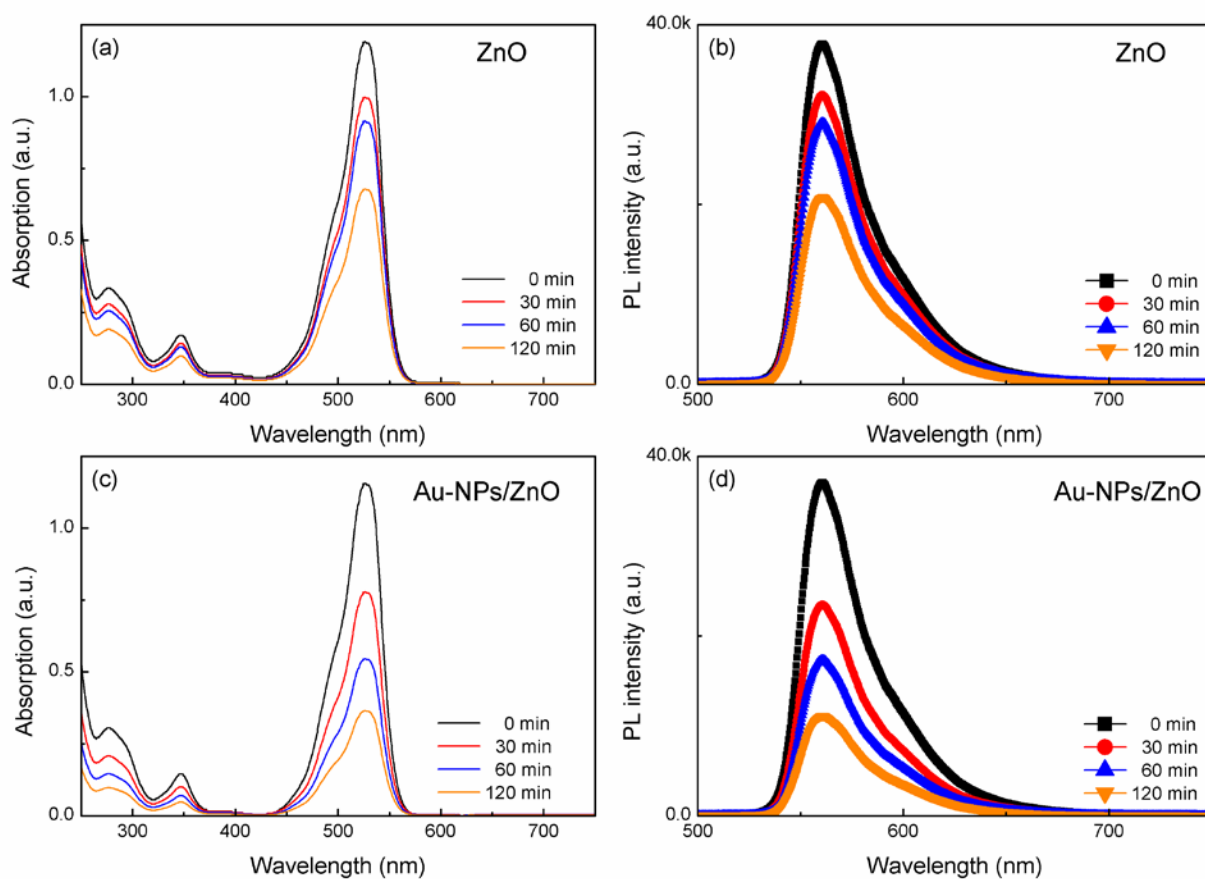

**Figure S3:** UV-vis absorption and PL spectra of RhB aqueous solution in presence of as-deposited ZnO film (a, b), and ZnO/Au film (c, d), respectively, after different periods of time.
